# Supplementary material for: Molecular characterization and expression analysis of a novel cold-inducible RNA-binding protein (CIRBP) gene in lamprey (Lethenteron reissneri)
Source: Springer Nature journal article supplement (doi:10.1007/s00427-022-00700-8), 2023-01-19

**Fig.S1**

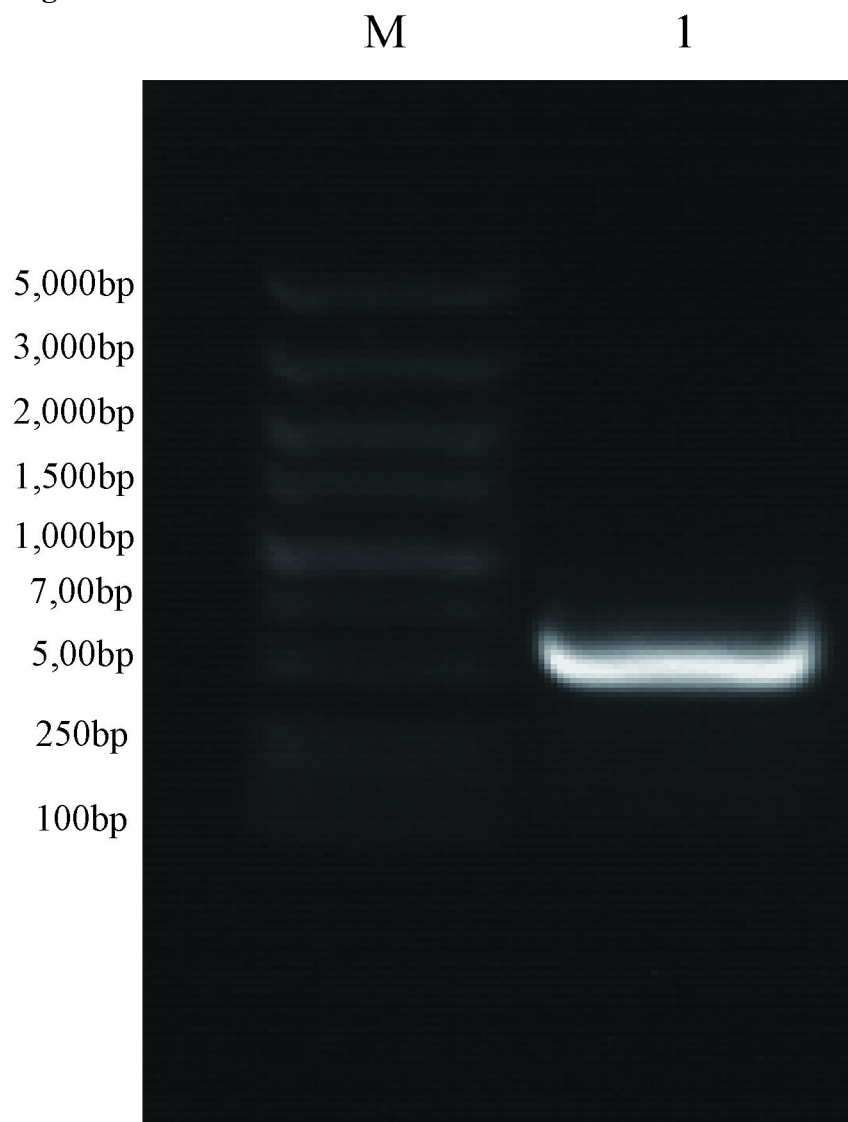

Fig.S2

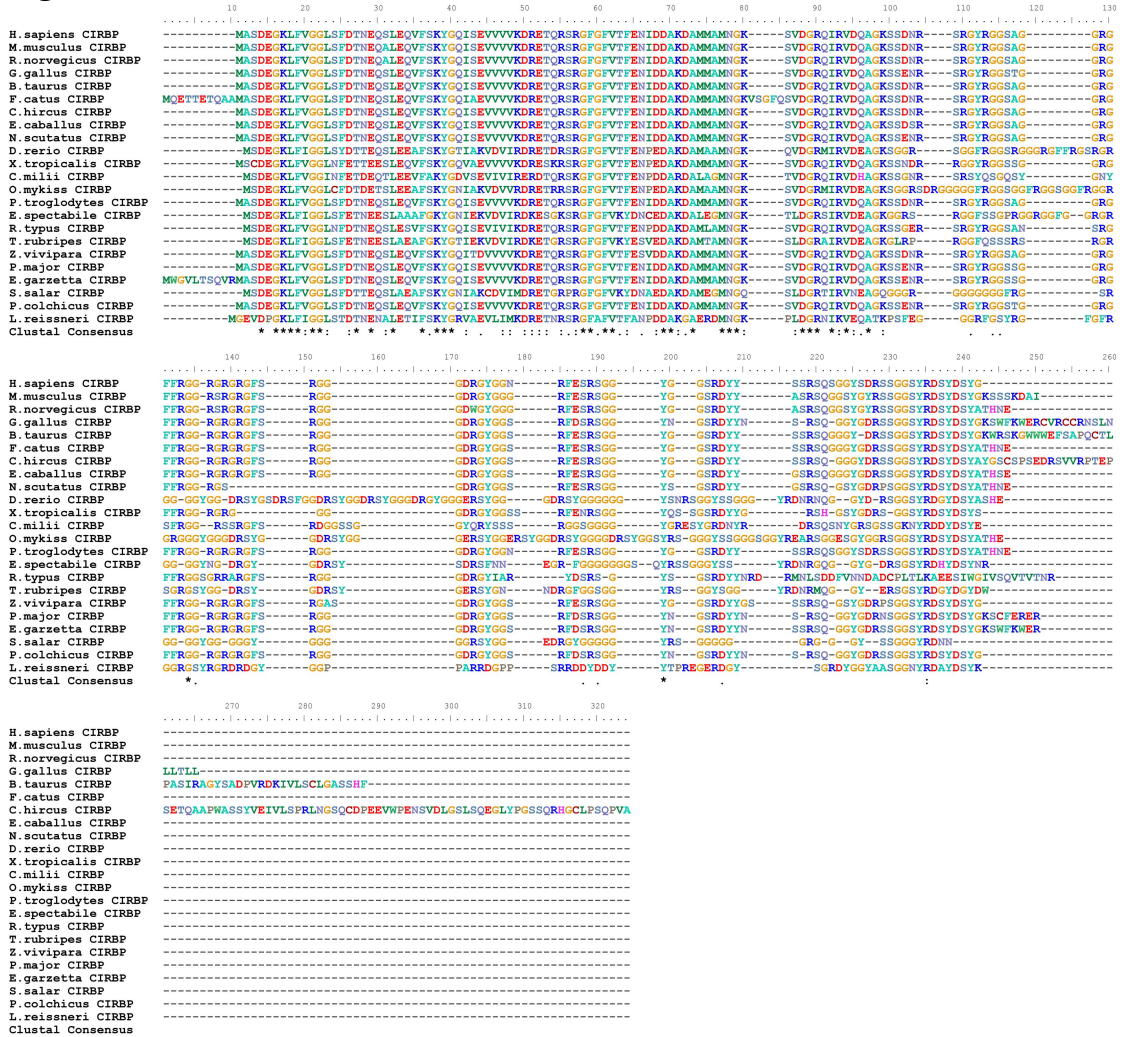

**Fig.S3**

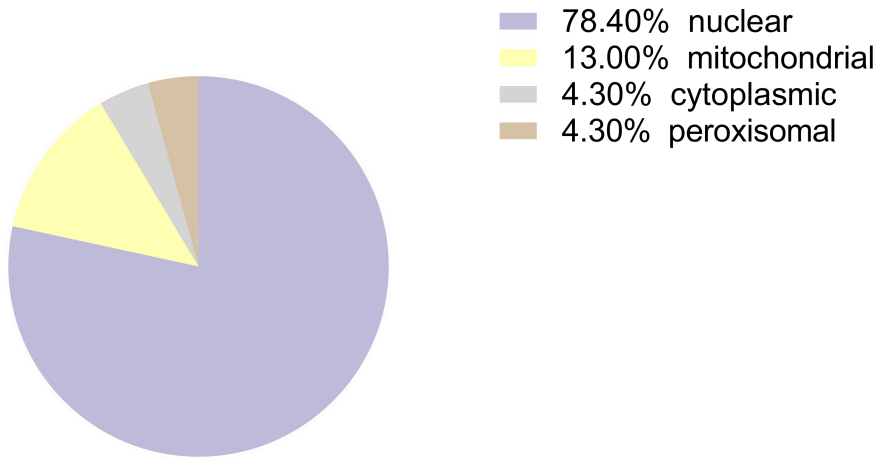

Supplement: 427_2022_700_MOESM1_ESM.pdf [file 427_2022_700_MOESM1_ESM.pdf]
